# Supplementary material for: Genome-wide identification of MADS-box family genes in moso bamboo (Phyllostachys edulis) and a functional analysis of PeMADS5 in flowering
Source: BMC Plant Biol. 2018 Sep 3;18:176. doi: 10.1186/s12870-018-1394-2 (PMC6122543; doi:10.1186/s12870-018-1394-2)
Supplement: Supplementary file 1 — Table S1. List of primers used for PeMADS genes cloning. Table S2. List of primers used for qPCR in P. edulis. Table S3. List of repeat numbers in the PeMADS gene family identified by the Repeat Masker online software. Table S4. List of transposable elements in PeMADS1, − 2, − 6, and − 7. Table S5. The primers for Real-time quantitatively RT-PCR in Arabidopsis. Table S6. List of cis-elements in 1.5 kb upstream promoter regions of PeMADSs. Table S7. List of CArG box in PeMADSs promoter and intron region. (XLSX 136 kb) [file 12870_2018_1394_MOESM1_ESM.xlsx]

## Sheet: Os-MADS
PH01002127G0260
PH01000306G0610
PH01000606G0250
PH01000466G0340
PH01000437G0930
PH01000059G1270
PH01000759G0450
PH01000038G1550
PH01000317G0080
PH01001878G0200
PH01000338G0120
PH01000616G0020
PH01002743G0050
PH01000006G0210
PH01005177G0100
PH01000794G0210
PH01001113G0580
PH01000216G0990
PH01001303G0110
PH01001952G0230
PH01000117G1210
PH01002152G0090
PH01002755G0230
PH01000080G0200
PH01003178G0150
PH01000954G0350
PH01000222G1060
PH01000518G0720
PH01000222G1190
PH01001188G0490
PH01001278G0330
PH01001952G0190
PH01021006G0010
PH01003236G0170
PH01000077G1380
PH01001174G0480
PH01002152G0120
PH01000107G0570
PH01000438G0210
PH01004500G0050
PH01002535G0020
PH01004397G0010
PH01002723G0130

## Sheet: Sheet3
At	Os	common	At unique	Os unique								同源
PH01002127G0260	PH01002127G0260	PH01002127G0260	PH01000967G0040	PH01000438G0210					PH01002127G0260	266aa	AHM92063		MADS-box protein 3 [Phyllostachys edulis]
PH01000306G0610	PH01000306G0610	PH01000306G0610	PH01000173G1010	PH01004500G0050					PH01000306G0610	257aa	ACB05814.1		flower development related protein [Phyllostachys praecox]	PpMADS1, a new member of AP1/SQUA-like MADS-box genes, is a
PH01000606G0250	PH01000606G0250	PH01000606G0250	PH01000887G0360	PH01002535G0020					PH01000606G0250	201aa	ACO53802.1		truncated MADS box protein [Phyllostachys praecox]	potential molecular marker for the prediction of bamboo
PH01000059G1270	PH01000466G0340	PH01000466G0340	PH01002030G0040	PH01004397G0010					PH01000466G0340	370aa				consenescence-induced flowering
PH01000759G0450	PH01000437G0930	PH01000437G0930	PH01001158G0640	PH01002723G0130					PH01000437G0930	228aa		ACF80425.1（Zm）
PH01000038G1550	PH01000059G1270	PH01000059G1270	PH01000264G0040						PH01000059G1270	222aa
PH01000466G0340	PH01000759G0450	PH01000759G0450	PH01002645G0030						PH01000759G0450	226aa		Os03g122600
PH01000437G0930	PH01000038G1550	PH01000038G1550	PH01000679G0060						PH01000038G1550	230aa
PH01000317G0080	PH01000317G0080	PH01000317G0080							PH01000317G0080	209aa	AHM92062.1		MADS-box protein 2 [Phyllostachys edulis]	De novo characterization of Bambusa edulis transcriptome and study
PH01000338G0120	PH01001878G0200	PH01001878G0200							PH01001878G0200	209aa			PISTILLATA-like MADS-box transcription factor, partial [Phyllostachys propinqua]	of MADS genes in bamboo floral development
PH01000006G0210	PH01000338G0120	PH01000338G0120							PH01000338G0120	226aa		NP_001289806.1（Bd）		duplicated PI genes in grasses
PH01001878G0200	PH01000616G0020	PH01000616G0020							PH01000616G0020	190aa		EAY82572.1（Os）
PH01002743G0050	PH01002743G0050	PH01002743G0050							PH01002743G0050	124aa	AHM92073.1(255 aa)		MADS-box protein 18 [Phyllostachys edulis]	De novo characterization of Bambusa edulis transcriptome and study
PH01005177G0100	PH01000006G0210	PH01000006G0210							PH01000006G0210	281aa		AAO92341.1（Os）		of MADS genes in bamboo floral development
PH01000616G0020	PH01005177G0100	PH01005177G0100							PH01005177G0100	211aa
PH01000216G0990	PH01000794G0210	PH01000794G0210							PH01000794G0210	273aa		NP_001289793.1(Bd)
PH01002152G0090	PH01001113G0580	PH01001113G0580							PH01001113G0580	301aa
PH01001952G0230	PH01000216G0990	PH01000216G0990							PH01000216G0990	63aa
PH01001303G0110	PH01001303G0110	PH01001303G0110							PH01001303G0110	132aa
PH01000794G0210	PH01001952G0230	PH01001952G0230							PH01001952G0230	79aa
PH01002755G0230	PH01000117G1210	PH01000117G1210							PH01000117G1210	152aa
PH01000117G1210	PH01002152G0090	PH01002152G0090							PH01002152G0090	96aa
PH01001113G0580	PH01002755G0230	PH01002755G0230							PH01002755G0230	105aa		SOC1-like
PH01000954G0350	PH01000080G0200	PH01000080G0200							PH01000080G0200	259aa		ABF57916.1(TaAGL11)
PH01003178G0150	PH01003178G0150	PH01003178G0150							PH01003178G0150	86aa
PH01000080G0200	PH01000954G0350	PH01000954G0350							PH01000954G0350	377aa
PH01000222G1060	PH01000222G1060	PH01000222G1060							PH01000222G1060	160aa
PH01000518G0720	PH01000518G0720	PH01000518G0720							PH01000518G0720	77aa
PH01000222G1190	PH01000222G1190	PH01000222G1190							PH01000222G1190	359aa
PH01001278G0330	PH01001188G0490	PH01001188G0490							PH01001188G0490	173aa	AHM92071.1		MADS-box protein 15 [Phyllostachys edulis]
PH01001188G0490	PH01001278G0330	PH01001278G0330							PH01001278G0330	235aa	AHM92063.1		MADS-box protein 3 [Phyllostachys edulis]
PH01002152G0120	PH01001952G0190	PH01001952G0190							PH01001952G0190	200aa	AHM92061.1		MADS-box protein 1 [Phyllostachys edulis]
PH01000107G0570	PH01021006G0010	PH01021006G0010							PH01021006G0010	152aa	AHM92076.1		MADS-box protein 58 [Phyllostachys edulis]
PH01001952G0190	PH01003236G0170	PH01003236G0170							PH01003236G0170	179aa
PH01021006G0010	PH01000077G1380	PH01000077G1380							PH01000077G1380	165aa
PH01001174G0480	PH01001174G0480	PH01001174G0480							PH01001174G0480	181aa	AHM92065.1		MADS-box protein 5 [Phyllostachys edulis]
PH01003236G0170	PH01002152G0120	PH01002152G0120							PH01002152G0120	202aa
PH01000077G1380	PH01000107G0570	PH01000107G0570							PH01000107G0570	309aa
PH01000967G0040	PH01000438G0210						At		PH01000967G0040	291aa
PH01000173G1010	PH01004500G0050								PH01000173G1010
PH01000887G0360	PH01002535G0020								PH01000887G0360
PH01002030G0040	PH01004397G0010								PH01002030G0040
PH01001158G0640	PH01002723G0130								PH01001158G0640
PH01000264G0040									PH01000264G0040
PH01002645G0030									PH01002645G0030
PH01000679G0060									PH01000679G0060
							Os		PH01000438G0210
									PH01004500G0050
									PH01002535G0020
									PH01004397G0010
									PH01002723G0130

## Sheet: Sheet1
MIKCC					MIKC*				Mα				Mβ				Mγ
PH01002127G0260	BeMADS3	OsMADS3			PH01001303G0110		OsMADS37		PH01000954G0350		OsMADS72
PH01001278G0330	BeMADS3	OsMADS3			PH01000117G1210		OsMADS37
PH01021006G0010	BeMADS58	OsMADS58			PH01002755G0230
PH01000216G0990		OsMADS5	SEP3 AGL9		PH01003178G0150		OsMADS65
PH01001952G0230		OsMADS1	SEP4 AGL3		PH01000222G1060
PH01001952G0190	BeMADS1	OsMADS1			PH01000466G0340		OsMADS68
PH01001174G0480	BeMADS5	OsMADS5			PH01000466G0380		OsMADS68
PH01000306G0610	BeMADS18	OsMADS18	AGL8 FUL
PH01002743G0050	BeMADS18	OsMADS18	AGL8 FUL
PH01000606G0250	BeMADS14	OsMADS14
PH01000222G1190	BeMADS14	OsMADS15
PH01001188G0490	BeMADS15	OsMADS15
PH01000006G0210		OsMADS20
PH01000518G0720		OsMADS20
PH01000437G0930		OsMADS22
PH01000077G1380		OsMADS55
PH01000080G0200		OsMADS55
PH01000038G1550		OsMADS47
PH01000059G1270		OsMADS56
PH01002152G0120		OsMADS56
PH01000759G0450		OsMADS56
PH01000107G0570		OsMADS56
PH01000317G0080	BeMADS2	OsMADS2
PH01001878G0200	BeMADS4	OsMADS4
PH01000794G0210	BeMADS4	OsMADS4
PH01000338G0120		OsMADS31
PH01003236G0170		OsMADS29
PH01001113G0580		OsMADS32
PH01005177G0100		OsMADS26
PH01002152G0090		OsMADS50
PH01000006G0350		OsMADS20
PH01000437G0990		OsMADS22
PH01000616G0020		OsMADS33
PH01001278G0450		OsMADS3
PH01000222G1200		OsMADS14

## Sheet: Table S1
Table S1 List of primers used for PeMADS genes cloning
Primer name	Sequences of primers
PeMADS1	5' ATGGCTTTTCTGCTTATGCA 3'
	5' CACCCGAGCTGAAGAGCTGT 3'
PeMADS2	5' AGTCTACACACCACATCCATT 3'
	5' GTGTTGTTATTGACACAGCG 3'
PeMADS3	5' ATGGGGCGCGGGAAGGTGCA 3'
	5' CATGAAGGACGAGGAAGAGTCT 3'
PeMADS4	5' ATGGGGAGGGTGAAGCTCAA 3'
	5' TAGAGTTGCTGCTGCAGGGA 3'
PeMADS5	5' ATGGCGCGGGAGCGGCGGGA 3'
	5' CTTCCATGCAACACAAGGCA 3'
PeMADS6	5' ATGGTGCGGGGGAAGACGCA 3'
	5' ACCTGACTCCCGGTTGGAGGT 3'
PeMADS7	5' AGCATGGTTAGCCCGATTATCT 3'
	5' AGAGCAGGTCACTAAGCTGA 3'
PeMADS9	5' ATGGGGCGCGGGAAGATTGA 3'
	5' CCAACCTGCAGGAGAACAAC 3'
PeMADS10	5' ATGGTGCGGGGGAAGACGCA 3'
	5' ACCCGAATCCCGGTTGGAGG 3'
PeMADS16	5' ATGGGGCGCGGCAAGATCGA 3'
	5' CTCGTCTTCCTGCAGGTTGG 3'
PeMADS19	5' ATGACGAAGCACAAGGTGAA 3'
	5' CACTCCTTTTCTGCTCTCGA 3'
PeMADS20	5' ATGGTCAGAGGGAAGGTGCA 3'
	5' CATATCCAACCTGCATATCCAGTG 3'
PeMADS29	5' ATGGGGAGGGGCAAGATAGA 3'
	5' TACCCGAGCTGAAGGGCTGT 3'
PeMADS34	5' ATGGGGCGTGGGAAAGTAGA 3'
	5' TAACCCGAATCCCGGTTGGA 3'
PeMADS24	5' ATGGCGCGGGAGAGGCGGGA 3'
	5' TAAGGCAACCCTAGTTTCAGGG 3'
PeAP3	5' ATGGGGCGCGGCAAGATCGA 3'
	5' TAACCGAGGCGCATGTCGTG 3'

## Sheet: Table S2
Table S2 List of primers used for qPCR.
Primer name	Sequences of primers
NTB	TCTTGTTTGACACCGAAGAGGAG
	AATAGCTGTCCCTGGAGGAGTTT
PeMADS1	5' TCACCTTCTGCAAGCGCCGCAATGG 3'
	5' TCAATGGTGGCTTTCACA 3'
PeMADS2	5' TAACGGTTCCAGATTCCA 3'
	5' TGCCGCTGTTTACTTGTG 3'
PeMADS3	5' ACTGAAGGCGAAGGTTGA 3'
	5' AGCTGGCTCTTTCTGGAT 3'
PeMADS4	5' CGAGCGTTACTCCTATGC 3'
	5' GTCTCAACCTTCGCCTTC 3'
PeMADS5	5' CGGGAGATAAAGCGGATAG 3'
	5' GTGGACGAGAAGACGATGA 3'
PeMADS6	5' CGCTCATCGTCTTCTCCC 3'
	5' GTTATTGGCATTATCCTTTGTG 3'
PeMADS7	5' CGCAGATGAAGCGGATAG 3'
	5' GGGAGAAGACAACGAGGG 3'
PeMADS8	5' GAGCAAGTGTCCCGGATGT 3'
	5' CGAGCCGAAGAGTGGTAAT 3'
PeMADS9	5' GCACAAGAGCCTTAGTTCG 3'
	5' TTCCCAGTGGTCCATCAG 3'
PeMADS10	5' CGGGACAAGCAGATGGAC 3'
	5' GCACTCGGAAGGTGAACG 3'
PeMADS11	5' TGAGTCTGGCAAGGGAACA 3'
	5' ACCACAGCCGAAGAACGT 3'
PeMADS12	5' ATGGTCAGAGGGAAGGTG 3'
	5' TTGCCAGTTCATGGAGTT 3'
PeMADS13	5' CCAGCCAAGCAAGTAATA 3'
	5' TTGCCTTGAGTTGAAATAGA 3'
PeMADS14	5' CGCTCATCGTCTTCTCCG 3'
	5' CACAACTCCATCTCAGGGT 3'
PeMADS15	5' TCTACGACCTCGCCACCA 3'
	5' AGCACCATTGCCTCCTGT 3'
PeMADS16	5' AAACCACGCTGCCAAGGA 3'
	5' TACGCAAACACCTAAGTGTGTACAA 3'
PeMADS17	5' CAAGAAGAACCGCAAGAAGC 3'
	5' AATGGAACCTGTTGTGGAGC 3'
PeMADS18	5' TGAAGCGGATCGAGAACAA 3'
	5' TCGCAGAGCACCGACAAC 3'
PeMADS19	5' GGGAGGAAGGAGGGATGA 3'
	5' ATGCTGGAGTTGGATGACG 3'
PeMADS20	5' GAACGGGCTGCTCAAGAA 3'
	5' ATCGAGGCGAAAGCAAAG 3'
PeMADS21	5' GCTGAGGCGGATAGAGGA 3'
	5' TCAATGCTGGAGTTGGAGG 3'
PeMADS23	5' CAAGGCTGTGAAGAAGACTGGG 3'
	5' GCCGATGCGAACTCGTAGAG 3'
PeMADS24	5' GAGATACGGCGGATAGAG 3'
	5' GGAGGAGAAGACGACGAG 3'
PeMADS25	5' CTGCGGCGGATCGAGGACAA 3'
	5' AGCGGCTGGAGGAGGAGTA 3'
PeMADS26	5' ATGCCACCGACAGGGCTTCT 3'
	5' ACGGCTTCCGCTCCCACTTC 3'
PeMADS28	5' TTTGTAAGTGGGCAGCAT 3'
	5' TTCGCCTTCAGTTTCCTAT 3'
PeMADS29	5' CAGTGACACCTCCAACGC 3'
	5' TTTCTCCAGCCTGCCCTC 3'
PeMADS31	5' TGATTCTATCGCCACCAT 3'
	5' CATTCTCAGCCACTTTGC 3'
PeMADS32	5' AATCCACCTTGAGGAGATACAC 3'
	5' TGCTTTCTTTCACGGACTTTA 3'
PeMADS33	5' ACGACTGCCACTCCTCCT 3'
	5' GCCCGAGTCTGATGGTCT 3'
PeMADS34	5' TCAGAGGAAAGAAGACCCAG 3'
	5' GCCTGAAGATAGCGATGC 3'
PeMADS35	5' TGGAAGAGCAGGTCACTAA 3'
	5' GTCCTTGAGCAGCGTCAT 3'
PeMADS40	5' GAGGGTTAGGAAAGATTAGAGC 3'
	5' TGTCCTCCTGCTGCTGTG 3'
PeMADS41	5' GAAGGAACTGGTGGAGAAG 3'
	5' ATGAAGGAGGAAGAGGATG 3'
PeMADS43	5' ACAAGGCTCTACAGAAGGA 3'
	5' TGAAGGAGGAAGAGGATG 3'

## Sheet: Table S3
Table S3 List of repeats numbers in PeMADS gene family by online software Repeat Masker
Sequence Description	Number of Repeats
PeMADS1	5
PeMADS2	11
PeMADS4	1
PeMADS6	17
PeMADS7	31
PeMADS15	2
PeMADS21	2
PeMADS24	2
PeMADS26	2
PeMADS28	6
PeMADS31	1
PeMADS32	1
PeMADS34	2
PeMADS36	1
PeMADS42	3
PeMADS43	6

## Sheet: Table S4
Table S4 List of transposable elements in PeMADS1, -2, -6, and -7.
Gene	Location	Position		Type		Type	Number
		begin	end	class/family		LTR/Gypsy	44
PeMADS1	PH01002127	172619	173303	LTR/Gypsy		Unknown	37
		174912	175219	Unknown		LTR/Copia	26
		183221	183245	DNA		Simple_repeat	8
		183246	183457	DNA/hAT-Tag1		DNA/MuDR	5
		183458	183471	DNA		LINE/L1	4
PeMADS2	PH01000306	36027	38295	LTR/Gypsy		DNA/hAT-Tag1	3
		38296	39460	LTR/Gypsy		DNA/En-Spm	3
		39459	40133	LTR/Copia		DNA	3
		40133	40532	Unknown		RC/Helitron	3
		40533	40608	LTR/Gypsy		DNA/hAT-Ac	2
		40609	41060	Unknown		DNA/Merlin	1
PeMADS6	PH01000059	753206	753249	Unknown		DNA/Harbinger	1
		753341	753541	DNA/Merlin
		754976	755158	DNA/MuDR
		755165	755617	DNA/hAT-Tag1
		755622	755985	DNA/MuDR
		756234	757011	DNA/Harbinger
		757571	759518	LTR/Gypsy
		759519	760077	Unknown
		760188	760768	LTR/Gypsy
		761064	761516	DNA/hAT-Ac
		763400	763527	LTR/Copia
		763435	763567	Simple_repeat
		763868	763977	Unknown
		764068	764194	DNA/En-Spm
		764152	764181	Unknown
		764182	766090	LTR/Gypsy
		766174	766437	LTR/Gypsy
		766746	766996	LTR/Gypsy
		767001	767146	Unknown
		767156	767370	LTR/Gypsy
		767637	768721	LTR/Gypsy
		768719	768784	Unknown
		768785	768873	LTR/Gypsy
		768874	768928	DNA/En-Spm
		768881	768914	Unknown
		768915	769316	LTR/Gypsy
		769315	770577	Unknown
		770578	771407	LTR/Gypsy
		771921	772112	DNA/MuDR
		772606	773290	Unknown
		773299	773915	LTR/Gypsy
		773913	774301	DNA
		774785	774887	RC/Helitron
		775431	775543	RC/Helitron
		776386	776574	RC/Helitron
		777092	777225	DNA/MuDR
		777383	777554	DNA/MuDR
		780197	780249	LINE/L1
		780464	781501	LINE/L1
		781516	781725	Unknown
		781728	782737	LINE/L1
		783246	783647	LINE/L1
		785593	787079	Unknown
		787158	787287	Unknown
		788100	788266	Unknown
		788279	788357	Unknown
		789003	789090	LTR/Copia
		789154	789440	Unknown
		789443	790851	LTR/Copia
		790852	792782	LTR/Gypsy
		792783	792822	Unknown
		792823	792910	LTR/Gypsy
		792839	792865	Unknown
		792866	793283	DNA/En-Spm
		793284	794142	Unknown
		794143	794345	LTR/Copia
		794602	799193	LTR/Copia
		799194	799369	Unknown
		799247	800056	LTR/Gypsy
		800059	801632	LTR/Copia
		801620	801766	LTR/Copia
		805126	806213	LTR/Copia
		806214	806426	LTR/Copia
		806427	806919	LTR/Copia
		806921	807248	LTR/Copia
		807613	807721	Simple_repeat
		808099	808143	Unknown
		808144	808255	Unknown
		808256	808434	Unknown
		808418	808945	DNA/hAT-Ac
PeMADS7	PH01000759	310795	311633	LTR/Gypsy
		312180	312483	Unknown
		321714	323303	LTR/Gypsy
		323304	326645	LTR/Gypsy
		326646	327822	LTR
		327820	328609	LTR/Gypsy
		328330	328925	LTR/Gypsy
		328487	329003	Unknown
		329039	329211	LTR/Gypsy
		329238	329463	LTR/Gypsy
		329267	329501	Unknown
		329404	329696	Unknown
		330286	330426	Simple_repeat
		331226	331815	LTR/Gypsy
		331838	331948	Simple_repeat
		331984	332425	Simple_repeat
		332233	332466	LTR/Gypsy
		332467	333366	Simple_repeat
		333367	333642	LTR/Gypsy
		333635	334427	LTR/Gypsy
		334554	338998	LTR/Gypsy
		340019	340043	LTR/Gypsy
		340044	340579	Unknown
		340580	340808	LTR/Gypsy
		341580	341756	LTR/Gypsy
		343525	344236	LTR/Gypsy
		346856	348202	LTR/Gypsy
		347216	348171	Unknown
		348172	348552	LTR/Gypsy
		349168	349233	Unknown
		349686	349784	LTR/Copia
		349722	349819	Simple_repeat
		349815	350549	LTR/Copia
		350550	350775	LTR/Gypsy
		350776	351219	Unknown
		351094	351263	LTR/Gypsy
		351264	351901	LTR/Gypsy
		351902	352033	LTR/Gypsy
		352036	352825	LTR/Copia
		352812	352905	LTR/Copia
		352825	352943	LTR/Copia
		352983	354695	LTR/Copia
		354691	358498	LTR/Copia
		358499	358656	Unknown
		358438	358736	Unknown
		358727	359135	LTR/Gypsy
		359189	359603	LTR/Gypsy
		359253	359694	Unknown
		359725	360180	Unknown
		360180	360418	LTR/Gypsy
		360425	364155	LTR/Gypsy
		364157	365594	LTR/Copia
		365572	367014	LTR/Copia
		367016	367127	LTR/Copia
		367053	367146	Simple_repeat
		368350	368572	LTR/Copia
		368730	371444	LTR/Copia
		371605	371658	LTR/Copia
		371605	371658	LTR/Copia

## Sheet: Table S5
Table S5 The primers for Real-time quantitatively RT-PCR in Arabidopsis
PeMADS5_F	CGACTTAGACAGATGAGAGG
PeMADS5_R	CGGTATCTGGGATACTTGA
AtSVP_F	GGAAAACTGTTCGAGTTCTG
AtSVP_R	TCTTTGTTTCAATCACACGC
AtCO_F	ACGCCATCAGCGAGTTCC
AtCO_R	AAATGTATGCGTTATGGTTAATGG
AtFT_F	AGAAGACTTTAGATGGCTTCTT
AtFT_R	TTATCGCATCACACACTATATAAG
AGL24_F	GGCTGGAGAAACTACTTGAA
AGL24_R	TTTAAGCGTCGTCAGTTTTG
AP1_F	CATGGGTGGTCTGTATCAAGAAGAT
AP1_R	CATGCGGCGAAGCAGCCAAGGTT
TUB2_F	AAGGACCTACTTCGGTGATGAG
TUB2_R	GCTCTCCACCAATGTTAAGATGAG
AtSOC1_F	AGCTGCAGAAAACGAGAAGCTCTCTG
AtSOC1_R	GGGCTACTCTCTTCATCACCTCTTCC
AtSEP3_F	CGGTCGTCATCATCATCAACA
AtSEP3_R	GTCCTGCTCCCATTCCATCTT

## Sheet: Table S6
Table S6 List of cis-elements in 1.5 kb upstream promoter regions of PeMADSs
Gene ID	1		2		3		4		5		6		7		8		9		10		11		12		13		14		15		16		17		18		19		20		21		22		23		24		25
PeMADS1	AC-I	1	ARE	2	ATC-motif	1	ATCT-motif	1	C-repeat/DRE	1	CAAT-box	34	CATT-motif	1	CCAAT-box	1	CGTCA-motif	2	G-Box	1	G-box	2	GARE-motif	1	GCC box	1	L-box	2	LTR	1	MBS	1	RY-element	1	Sp1	1	TATA-box	19	TATCCAT/C-motif	1	TCA-element	1	TCCACCT-motif	1	TCT-motif	1	TGACG-motif	2	Unnamed__1
PeMADS2	A-box	1	ABRE	2	AC-I	1	AC-II	1	ACE	1	ARE	1	AT1-motif	2	Box 4	3	CAAT-box	22	CAT-box	2	CCGTCC-box	1	CGTCA-motif	6	G-Box	1	G-box	6	GATA-motif	1	GC-motif	1	HSE	4	I-box	1	MBS	1	MBSII	1	MNF1	1	O2-site	1	P-box	1	Skn-1_motif	1	Sp1
PeMADS3	A-box	2	ABRE	5	AC-I	1	AC-II	1	AE-box	2	ARE	2	Box 4	1	Box I	1	Box III	1	CAAT-box	20	CAT-box	1	CCGTCC-box	2	CGTCA-motif	4	EIRE	1	G-Box	1	G-box	2	GAG-motif	1	GATA-motif	1	GC-motif	2	GCN4_motif	1	HSE	1	LTR	3	MBS	4	Sp1	8	TATA-box
PeMADS4	AAGAA-motif	1	ABRE	1	ATCT-motif	2	Box III	1	CAAT-box	23	CATT-motif	1	CGTCA-motif	1	G-Box	1	G-box	3	GA-motif	2	GAG-motif	2	GCN4_motif	3	MBS	2	O2-site	1	OCT	1	P-box	1	Skn-1_motif	4	Sp1	9	TATA-box	25	TATC-box	1	TC-rich repeats	2	TCCC-motif	1	TGA-element	1	TGACG-motif	1	Unnamed__1
PeMADS5	AAGAA-motif	1	ACE	1	ARE	1	Box 4	1	Box I	3	C-box	1	CAAT-box	23	CAT-box	1	CATT-motif	1	ERE	1	G-box	14	GA-motif	1	GC-motif	1	HSE	2	MBS	1	NON-box	1	RY-element	1	Skn-1_motif	2	Sp1	4	TATA-box	18	TC-rich repeats	1	TCCACCT-motif	1	TGA-element	1	Unnamed__1	4	Unnamed__3
PeMADS6	4cl-CMA2b	1	ABRE	9	AC-I	1	ARE	2	ATC-motif	2	Box 4	3	Box I	1	Box-W1	1	CAAT-box	17	CAT-box	3	CCAAT-box	1	CGTCA-motif	1	G-box	5	G-box	8	GAG-motif	2	GATT-motif		GCN4_motif	1	GT1-motif	1	L-box	1	MBS	5	MNF1	1	O2-site	1	RY-element	2	Skn-1_motif	1	Sp1
PeMADS7	A-box	1	AC-I	2	AC-II	1	ARE	3	Box I	2	CAAT-box	22	CCAAT-box	1	CCGTCC-box	1	CGTCA-motif	1	G-box	3	GARE-motif	1	GCN4_motif	1	GT1-motif	1	LTR	4	Skn-1_motif	1	Sp1	7	TATA-box	36	TGACG-motif	1	Unnamed__1	2	Unnamed__16	1	Unnamed__3	2	Unnamed__4	7	circadian	3	dOCT
PeMADS8	A-box	1	ABRE	2	ARE	1	AuxRR-core	1	Box 4	2	Box I	1	CAAT-box	20	CAT-box	1	CCGTCC-box	1	CGTCA-motif	1	G-box	2	GAG-motif	1	GARE-motif	1	HD-Zip 3	1	HSE	2	LAMP-element	2	MBS	1	Skn-1_motif	1	Sp1	1	TA-rich region	18	TATA-box	126	TATCCAT/C-motif	1	TC-rich repeats	1	TCA-element	1	TGACG-motif
PeMADS9	3-AF1 binding site	1	ABRE	1	ACE	1	ARE	2	ATCT-motif	1	Box I	1	CAAT-box	21	CAT-box	3	CCAAT-box	1	CGTCA-motif	1	ERE	1	G-Box	1	G-box	3	GAG-motif	7	GC-motif	1	GCN4_motif	1	HSE	1	LTR	2	Skn-1_moti	3	Sp1	34	TATA-box	30	TGACG-motif	1	Unnamed__1	1	Unnamed__3	1	Unnamed__4
PeMADS10	ABRE	1	AC-II	2	ARE	1	Box 4	2	Box I	2	Box-W1	2	CAAT-box	23	CAT-box	2	CGTCA-motif	5	G-Box	3	G-box	4	GAG-motif	2	GATA-motif	1	GC-motif	1	GCN4_motif	3	I-box	1	LTR	1	MBS	2	MNF1	1	O2-site	2	RY-element	1	Skn-1_motif	3	TATA-box	43	TATC-box	2	TCCC-motif
PeMADS11	AAGAA-motif	2	ABRE	1	Box-W1	1	CAAT-box	30	CAT-box	1	CCAAT-box	1	CTAG-motif	2	G-Box	1	G-box	1	GA-motif	1	GAG-motif	4	GARE-motif	2	GC-motif	3	GCN4_motif	1	I-box	1	MBS	4	Skn-1_motif	3	Sp1	7	TATA-box	21	TCA-element	1	Unnamed__1	1	Unnamed__2	1	Unnamed__3	1	Unnamed__4	24	W box
PeMADS12	ACE	1	AE-box	1	ARE	2	AT-rich sequence	1	ATCT-motif	1	Box 4	4	Box I	1	Box II	1	Box III	1	Box-W1	1	CAAT-box	41	CATT-motif	2	CGTCA-motif	1	G-box	1	GAG-motif	1	GARE-motif	1	GCN4_motif	1	GT1-motif	1	HSE	2	MBS	3	P-box	4	Skn-1_motif	1	TATA-box	40	TATCCAT/C-motif	1	TC-rich repeats
PeMADS13	5UTR Py-rich stretch	1	ABRE	3	ACE	1	AE-box	1	ARE	1	ATCT-motif	1	Box 4	1	Box-W1	1	CAAT-box	12	CATTAT-motif	1	CCAAT-box	1	G-Box	3	G-box	11	GATA-motif	1	GC-motif	1	HSE	1	I-box	1	MBS	1	Skn-1_motif	3	Sp1	3	TATA-box	8	TC-rich repeats	1	TCT-motif	1	Unnamed__1	10	Unnamed__3
PeMADS14	5UTR Py-rich stretch	1	A-box	2	AAGAA-motif	2	ABRE	5	ACE	1	Box 4	1	Box-W1	1	CAAT-box	16	CAG-motif	1	CAT-box	2	CATT-motif	1	CCGTCC-box	2	G-Box	2	G-box	8	GATA-motif	2	GCC box	1	GT1-motif	1	I-box	2	MBS	1	MNF1	1	MRE	1	P-box	2	Skn-1_motif	2	Sp1	3	TATA-box
PeMADS15	5UTR Py-rich stretch	1	A-box	3	ABRE	1	ACE	1	AE-box	1	ARE	1	ATC-motif	1	ATCT-motif	1	CAAT-box	19	CAT-box	1	CATT-motif	1	CCGTCC-box	3	CGTCA-motif	3	G-Box	1	G-box	2	GA-motif	1	GAG-motif	2	GARE-motif	3	GATA-motif	1	GTGGC-motif	1	LTR	2	MBS	2	O2-site	1	RY-element	1	Skn-1_motif
PeMADS16	A-box	4	AAGAA-motif	1	ARE	1	C-repeat/DRE	1	CAAT-box	13	CAT-box	2	CCAAT-box	1	CCGTCC-box	4	CGTCA-motif	2	CTAG-motif	2	GC-motif	1	GCC box	2	GCN4_motif	1	HSE	1	MBS	1	MNF1	2	MRE	1	Sp1	8	TATA-box	43	TCCC-motif	1	TGACG-motif	2	Unnamed__1	3	Unnamed__3	3	Unnamed__4	28	box E
PeMADS17	AAGAA-motif	1	AC-I	2	ACE	1	ATGCAAAT motif	1	Box I	2	CAAT-box	27	CCAAT-box	1	ERE	2	G-Box	1	G-box	1	GATA-motif	1	GCN4_motif	2	GT1-motif	2	HSE	2	L-box	1	LTR	2	MBS	2	MRE	1	O2-site	1	RY-element	1	Skn-1_motif	2	Sp1	2	TATA-box	48	TATC-box	1	TCT-motif
PeMADS19	5UTR Py-rich stretch	2	AAGAA-motif	2	ABRE	4	AE-box	1	ATGCAAAT motif	1	Box 4	1	Box I	1	Box III	1	CAAT-box	25	CGTCA-motif	3	F-box	1	G-box	2	G-box	5	GARE-motif	2	GTGGC-motif	2	HSE	1	MBS	2	MRE	1	P-box	2	Sp1	6	TATA-box	43	TC-rich repeats	2	TCT-motif	2	TGA-element	1	TGACG-motif
PeMADS20	ABRE	5	ARE	3	ATCT-motif	1	Box I	1	Box-W1	3	CAAT-box	17	CAT-box	2	CCAAT-box	1	CGTCA-motif	1	G-Box	3	G-box	6	GAG-motif	2	GC-motif	3	GCN4_motif	1	GT1-motif	1	I-box	1	LTR	2	MBS	3	Skn-1_motif	6	Sp1	4	TATA-box	20	TC-rich repeats	1	TCCC-motif	1	TCT-motif	1	TGA-element
PeMADS21	A-box	1	AAGAA-motif	1	ABRE	5	AC-I	1	ACE	1	AE-box	1	ARE	2	ATC-motif	1	Box-W1	1	CAAT-box	19	CAT-box	1	CCGTCC-box	1	CGTCA-motif	3	EIRE	1	G-box	7	GAG-motif	1	GC-motif	1	GCN4_motif	3	GT1-motif	1	MBS	1	O2-site	1	SARE	1	Sp1	11	TATA-box	16	TCCACCT-motif
PeMADS23	3-AF1 binding site	1	A-box	5	AAGAA-motif	1	ABRE	1	AC-II	1	ACE	1	ARE	1	Box I	3	Box-W1	2	CAAT-box	25	CAT-box	2	CCAAT-box	1	CCGTCC-box	5	CGTCA-motif	3	ERE	1	G-box	1	GAG-motif	1	GCC box	1	GCN4_motif	3	GT1-motif	4	HSE	5	MRE	1	Skn-1_motif	3	Sp1	5	TATA-box
PeMADS24	ABRE	2	AC-I	1	ARE	1	ATCT-motif	2	Box 4	1	Box I	1	Box III	1	Box-W1	1	CAAT-box	10	CATT-motif	1	CCAAT-box	1	CG-motif	1	CGTCA-motif	1	G-Box	2	G-box	5	GAG-motif	1	GATA-motif	1	GC-motif	2	GT1-motif	1	HSE	2	I-box	1	LTR	2	O2-site	1	Skn-1_motif	1	Sp1
PeMADS25	AAGAA-motif	1	ABRE	3	AE-box	1	ARE	4	CAAT-box	31	CATT-motif	4	CCAAT-box	1	CGTCA-motif	1	G-Box	3	G-box	5	GA-motif	1	GAG-motif	1	GATA-motif	1	Gap-box	1	I-box	2	LTR	1	MBS	3	O2-site	1	OBP-1 site	1	Skn-1_motif	1	Sp1	2	TATA-box	20	TC-rich repeats	3	TCA-element	3	TGA-element
PeMADS26	5UTR Py-rich stretch	7	AAGAA-motif	1	ABRE	1	AC-II	1	ACE	1	ARE	2	ATCT-motif	1	Box 4	2	CAAT-box	22	CAG-motif	1	CAT-box	1	CGTCA-motif	3	E2Fb	1	G-Box	1	G-box	3	GC-motif	4	GCN4_motif	1	GT1-motif	1	I-box	1	MNF1	1	MRE	1	O2-site	1	P-box	2	Skn-1_motif	2	Sp1
PeMADS28	ABRE	6	ARE	2	AuxRR-core	1	Box-W1	4	CAAT-box	29	CGTCA-motif	2	G-Box	2	G-box	2	GAG-motif	1	GC-motif	1	GCN4_motif	1	GT1-motif	2	JERE	1	LAMP-element	1	LTR	1	MBS	2	MSA-like	1	O2-site	1	Pc-CMA2c	1	Skn-1_motif	4	TATA-box	7	TCCC-motif	1	TCT-motif	1	TGA-element	1	TGACG-motif
PeMADS29	3-AF1 binding site	1	A-box	1	ABRE	1	AE-box	1	ARE	2	AT-rich element	1	Box 4	2	Box III	1	CAAT-box	22	CAT-box	2	CCGTCC-box	1	CTAG-motif	1	G-box	1	GA-motif	3	GARE-motif	1	GCN4_motif	1	GT1-motif	2	I-box	2	MBS	2	MRE	1	O2-site	1	P-box	2	Skn-1_motif	1	TATA-box	23	TATCCAT/C-motif
PeMADS31	ABRE	1	CAAT-box	11	G-box	1	G-box	1	GAG-motif	1	Skn-1_motif	1	TATA-box	4	TCA-element	1	Unnamed__4	3	chs-CMA1a	1
PeMADS32	AAGAA-motif	1	ATCT-motif	1	CAAT-box	12	CATT-motif	1	G-Box	1	G-box	3	GC-motif	1	I-box	1	LTR	1	MBS	1	MNF1	1	Pc-CMA2c	1	Skn-1_motif	3	Sp1	1	TATA-box	1	TCCACCT-motif	2	Unnamed__1	1	Unnamed__10	1	Unnamed__12	1	Unnamed__14	1	Unnamed__16	1	Unnamed__2	1	Unnamed__3	1	Unnamed__4	9	Unnamed__8
PeMADS33	ABRE	2	ARE	1	AT-rich sequence	1	ATCT-motif	1	Box 4	1	Box II	1	CAAT-box	13	CGTCA-motif	4	G-Box	1	G-box	4	GA-motif	1	GC-motif		GT1-motif	1	HSE	1	MBS	3	O2-site	1	P-box	1	Skn-1_motif	1	Sp1	1	TATA-box	38	TCA-element	1	TGACG-motif	4	Unnamed__1	3	Unnamed__3	3	Unnamed__4
PeMADS34	A-box	1	AAGAA-motif	3	ABRE	3	ACE	1	AE-box	1	AT-rich element	1	ATCC-motif	1	Box II	1	Box-W1	1	CAAT-box	24	CCGTCC-box	1	G-box	2	G-box	2	GC-motif	2	GT1-motif	2	MBS	4	MNF1	1	O2-site	2	P-box	2	Sp1	19	TATA-box	21	Unnamed__1	5	Unnamed__3	4	Unnamed__4	24	W box
PeMADS35	5UTR Py-rich stretch	1	AAGAA-motif	1	ABRE	4	ACE	1	ARE	4	CAAT-box	16	G-Box	3	G-box	7	GATA-motif	1	GCN4_motif	3	I-box	2	LAMP-element	1	Skn-1_motif	2	Sp1	7	TATA-box	22	TATC-box	1	TGA-element	1	Unnamed__1	3	Unnamed__3	3	Unnamed__4	8
PeMADS40	3-AF1 binding site	2	5UTR Py-rich stretch	9	AAGAA-motif	2	AE-box	1	ARE	1	Box 4	1	Box I	1	Box-W1	1	CAAT-box	23	CAT-box	1	CGTCA-motif	2	ERE	1	G-Box	1	G-box	2	GAG-motif	2	GCN4_motif	1	I-box	1	LTR	2	MBS	1	P-box	1	Skn-1_motif	1	Sp1	6	TATA-box	13	TATCCAT/C-motif	1	TCA-element
PeMADS41	3-AF1 binding site	1	5UTR Py-rich stretch	11	A-box	1	AAGAA-motif	1	ABRE	3	AC-I	2	AC-II	1	ARE	1	ATCT-motif	1	Box 4	2	Box I	1	Box III	1	CAAT-box	26	CAT-box	2	CGTCA-motif	1	CTAG-motif	1	E2Fb	1	EIRE	1	ERE	1	G-Box	2	G-box	4	GAG-motif	2	GARE-motif	1	GT1-motif	1	LTR
PeMADS43	5UTR Py-rich stretch	1	A-box	1	ARE	4	AT-rich sequence	1	Box 4	1	Box-W1	1	CAAT-box	24	CCGTCC-box	1	CE3	1	G-box	2	GC-motif	2	GC-repeat	1	GCN4_motif	1	GT1-motif	1	GTGGC-motif	1	HSE	1	I-box	1	LTR	1	MBS	1	O2-site	1	Skn-1_motif	1	Sp1	11	TATA-box	36	TGA-element	1	Unnamed__1
PeAP3	A-box	1	AAGAA-motif	2	ABRE	2	AC-II	1	AE-box	2	ARE	1	Box 4	1	Box I	1	CAAT-box	12	CAT-box	2	CATT-motif	1	CCAAT-box	2	CCGTCC-box	1	CGTCA-motif	2	ERE	1	G-Box	1	G-box	2	GA-motif	1	GARE-motif	1	GC-motif	1	GCN4_motif	1	LTR	1	MBS	3	MNF1	1	MSA-like
PeAGL6	4cl-CMA2b	1	ABRE	9	AC-I	1	ARE	2	ATC-motif	2	Box 4	3	Box I	3	Box-W1	1	CAAT-box	1	CAT-box	5	CCAAT-box	8	CGTCA-motif	2	G-Box	1	G-box	1	GAG-motif	1	GATT-motif	1	GCN4_motif	1	GT1-motif	1	L-box	1	MBS	5	MNF1	1	O2-site	1	RY-element	2	Skn-1_motif	1	Sp1
PeMα1	A-box	1	AAGAA-motif	2	ABRE	1	AuxRR-core	1	CAAT-box	7	CAT-box	2	CCGTCC-box	1	CGTCA-motif	2	G-box	4	GAG-motif	1	HSE	3	LTR	1	MBS	2	MNF1	1	P-box	1	Skn-1_motif	1	Sp1	1	TATA-box	13	TC-rich repeats	2	TCA-element	2	TGA-element	2	TGACG-motif	2	Unnamed__1	4	Unnamed__3	4	Unnamed__4
PeMα2	A-box	1	ABRE	1	AE-box	1	ARE	1	Box 4	1	CAAT-box	29	CATT-motif	1	CCGTCC-box	1	CGTCA-motif	3	G-Box	1	G-box	2	GA-motif	1	GAG-motif	1	GATA-motif	1	GT1-motif	2	HSE	2	I-box	1	MBS	4	MRE	1	P-box	1	Skn-1_motif	1	Sp1	5	TATA-box	39	TC-rich repeats	1	TCT-motif
PeMα3	5UTR Py-rich stretch	1	AAGAA-motif	3	ABRE	1	ACE	1	Box 4	5	CAAT-box	20	CATT-motif	1	CCAAT-box	1	CGTCA-motif	3	G-Box	1	G-box	3	GA-motif	2	GARE-motif	1	GT1-motif	2	HSE	1	I-box	1	L-box	2	LTR	2	MBSII	1	MNF1	1	O2-site	2	Skn-1_motif	2	Sp1	1	TATA-box	52	TATCCAT/C-motif
[truncated: 33 more columns]

## Sheet: Table S7
Table S7 List of CArG-box in PeMADSs promoter and intron region
MADS-box gene	Position of CArG-box in promoter region	No.	Position of CArG-box in intron region	No.	Total
PeMADS1	-177, -1952	2	523, 572, 877, 2512, 2753, 3118, 3873, 3874, 5424, 5527, 8423	11	13
PeMADS2	-1897	2	564, 5309, 5470, 6180, 7003, 7134, 16736, 17463, 17607, 17833, 18076, 18980, 20430, 21731	14	16
PeMADS3	-1883	2	528, 1968, 2414, 2976, 4316, 4686	6	8
PeMADS4	-1568	2	242	1	3
PeMADS5	-717, -768-1103	3	190, 2134, 3135, 5014, 5352	5	8
PeMADS6	-1492, -1667	2	2123, 2281, 2922, 4041, 4933, 6097, 6443, 10493, 10494, 11206, 11812, 15904, 17157, 21070, 22505, 23070, 23488, 23821, 23822, 24846, 24963, 25704, 27492, 27768, 27769, 29766, 34661, 37735, 42253, 49099, 50119, 51862, 54831, 54867, 56103	35	37
PeMADS7	-1060	1	3456, 3559, 6757, 6988, 8429, 9490, 11901, 11966, 15551, 15719, 16189, 17474, 18363, 19533, 19534, 19558, 19752, 23315, 24281, 27541, 28371, 29857, 30246, 31275, 31276, 32279, 33435, 33761, 38118, 39658, 39899, 43431, 43619, 45033, 46677, 46785, 50217, 50467, 53652, 57141, 57714, 62788	42	43
PeMADS8	-717, -768, -1103	3	582, 1778, 1902, 2008, 5156	5	8
PeMADS9	-1363	1	770, 1893	2	3
PeMADS10		0		0	0
PeMADS11	-501	1	1146	1	2
PeMADS12	-31, -167	2		0	2
PeMADS13	-724	1		0	1
PeMADS14	-36	1	4114	1	2
PeMADS15		0	1986	1	1
PeMADS16		0		0	0
PeMADS17	-500, -336	2	380, 1787, 2368, 2573	4	6
PeMADS19	-635, -1734	2	51	1	3
PeMADS20		0		0	0
PeMADS21	-1153	1	298	1	2
PeMADS23	-1579, -1777	2		0	2
PeMADS24	-161	1	2146, 2503, 2848, 2862, 2962, 3902, 3958, 4181, 5379, 7701	10	11
PeMADS25		0		0	0
PeMADS26		0		0	0
PeMADS28	-21, -50, -1556	3	3867, 5312, 6538	3	6
PeMADS29	-1225, -1868	2	1478, 2788	2	4
PeMADS31		0	609, 695	2	2
PeMADS32		0		0	0
PeMADS33	-54	1	1680, 1849, 1958, 2081, 2741, 2821	6	7
PeMADS34	-239, -1601, -1645	3	966, 1029	2	5
PeMADS35	-184, -1130, -1160	3	21, 2299	2	5
PeMADS40	-441, -941, -1257	3	1179, 1190	2	5
PeMADS41	-1363, -1490, -1539, -1781	4		0	4
PeMADS43	-714, -1992	2	1151, 2114, 2145, 2213, 2298	5	7
PeAP3		0	1334, 1335, 3512, 3526	4	4
PeAGL6		0	966, 1045, 1757, 2329, 3073, 4024, 4221, 4830, 4968, 5073, 5849, 13991, 23650, 24691, 24692	15	15
PeMα1	-796, -1927	2		0	2
PeMα2		0		0	0
PeMα3	-494, -738, -777, -958	4		0	4
PeMα4	-101, -1811	2		0	2
PeMα5	-404, -708	2		0	2
PeMα6		0		0	0

[truncated: 1 more sheets: Table 3]
